# Supplementary material
Source: PubMed Central journal article supplement (PMC6777443)
Supplement: 41431_2019_391_MOESM2_ESM.pdf [file 41431_2019_391_MOESM2_ESM.pdf]

1. What is your occupation?

- |                                                      |                                          |
|------------------------------------------------------|------------------------------------------|
| <input type="radio"/> Consultant Clinical Geneticist | <input type="radio"/> Clinical Scientist |
| <input type="radio"/> Genetic Counsellor             | <input type="radio"/> Cardiologist       |
| <input type="radio"/> Trainee in Clinical Genetics   |                                          |

2. In which hospital do you work?

3. Please estimate what number of cardiac genetics patients are seen by your service each year

4. Is NGS-based inherited cardiac gene testing performed in the laboratory in your Genetics Centre?

- Yes
- No

5. If you do not perform NGS in house for this purpose, to which laboratory do you send your tests?

6. Do you have a sub-specialty interest in cardiac genetics or are you contracted to provide dedicated hours to cardiac genetics?

- yes
- no

7. Is there a consultant Clinical geneticist within your unit who is sub-specialised in cardiac genetics?

- Yes
- No
- I don't know

8. Do you routinely discuss test results with a clinical cardiology team in a multidisciplinary meeting?

- yes
- no
- I don't know

9. Considering DNA sequence variants classified as outlined here below:

Class 1 = Benign

Class 2 = Likely benign

Class 3 = Variant of unknown significance,

Class 4 = Likely pathogenic,

Class 5 = Pathogenic

please select a response to the following questions:

|                                                                                                             | Yes                   | No                    | Only to <b>AFFECTED</b> individuals for segregation analysis |
|-------------------------------------------------------------------------------------------------------------|-----------------------|-----------------------|--------------------------------------------------------------|
| Do you offer cascade testing to family members of a proband in whom a <b>class 5</b> variant is identified? | <input type="radio"/> | <input type="radio"/> | <input type="radio"/>                                        |
| Do you offer cascade testing to family members of a proband in whom a <b>class 4</b> variant is identified? | <input type="radio"/> | <input type="radio"/> | <input type="radio"/>                                        |
| Do you offer cascade testing to family members of a proband in whom a <b>class 3</b> variant is identified? | <input type="radio"/> | <input type="radio"/> | <input type="radio"/>                                        |

10. Considering pre-test counselling for cascade testing of **CLASS 4** variants,

|                                                                                                                    | Yes                   | No                    | I don't know/not sure |
|--------------------------------------------------------------------------------------------------------------------|-----------------------|-----------------------|-----------------------|
| Not applicable, we never offer cascade testing for class 4 variants                                                | <input type="radio"/> | <input type="radio"/> | <input type="radio"/> |
| Do you explain that there may be a degree of uncertainty about the pathogenicity of a <b>class 4</b> variant?      | <input type="radio"/> | <input type="radio"/> | <input type="radio"/> |
| Do you mention the possibility of the pathogenicity classification changing as new evidence emerges in the future? | <input type="radio"/> | <input type="radio"/> | <input type="radio"/> |

11. How often, in your opinion, should routine variant reclassification be performed? Please select one option

- I do not think variant reclassification should be actively undertaken at all
  Every three years  
 Every 6 months
  Every five years  
 Annually

12. In an asymptomatic individual that has **NORMAL** predictive testing for a familial **Class 4** variant, please answer the following:

|                                                                                                         | Yes                   | No                    | n/a - I would leave this decision to their cardiologist |
|---------------------------------------------------------------------------------------------------------|-----------------------|-----------------------|---------------------------------------------------------|
| Are you totally reassuring that they have no risk of developing the familial phenotype?                 | <input type="radio"/> | <input type="radio"/> | <input type="radio"/>                                   |
| If they have not seen a cardiologist, do you refer them for assessment?                                 | <input type="radio"/> | <input type="radio"/> | <input type="radio"/>                                   |
| If they have seen a cardiologist and have no clinical signs, do you recommend discharge from follow-up? | <input type="radio"/> | <input type="radio"/> | <input type="radio"/>                                   |
| Do you discuss their result at MDT meeting prior to making these clinical decisions?                    | <input type="radio"/> | <input type="radio"/> | <input type="radio"/>                                   |

13. Do you have any other concerns regarding the use of NGS for investigation of inherited cardiac pathology? If so, please list here below (optional)

14. Which of the following situations should trigger variant reclassification? Please select all that apply

- |                                                                                                      |                                                                                                                    |
|------------------------------------------------------------------------------------------------------|--------------------------------------------------------------------------------------------------------------------|
| <input type="checkbox"/> Variant reclassification should be routinely performed as standard practice | <input type="checkbox"/> New data is generated regarding the variant from population databases (e.g. ExAC, gnomAD) |
| <input type="checkbox"/> An individual in a family receives a new diagnosis                          | <input type="checkbox"/> New literature is published regarding the variant                                         |
| <input type="checkbox"/> New conflicting information regarding the familial phenotype comes to light | <input type="checkbox"/> Variant reclassification is mandated by the governing professional body (e.g. AGCS)       |
